# Supplementary material for: Hydrothermal growth of few layer 2H-MoS2for heterojunction photodetector and visible light induced photocatalytic applications
Source: Royal Society of Chemistry journal article supplement (doi:10.1039/c5ta09003b), 2016-01-01
Supplement: c5ta09003b1.pdf [file c5ta09003b1.pdf]

## Electronic Supplementary Information (ESI)

### Hydrothermal Growth of Few Layer 2H-MoS<sub>2</sub> for Heterojunction Photodetector and Visible Light Induced Photocatalytic Applications

Anupam Midya,<sup>1</sup> Arup Ghorai,<sup>1</sup> Subhrajit Mukherjee,<sup>2</sup> Rishi Maiti,<sup>3</sup> Samit K Ray<sup>1,3\*</sup>

<sup>1</sup>School of Nanoscience and Technology, Indian Institute of Technology Kharagpur, Kharagpur 721302

<sup>2</sup>Advanced Technology Development Centre, Indian Institute of Technology Kharagpur, Kharagpur 721302

<sup>3</sup>Department of Physics, Indian Institute of Technology Kharagpur, Kharagpur 721302

\*Email: physkr@phy.iitkgp.ernet.in

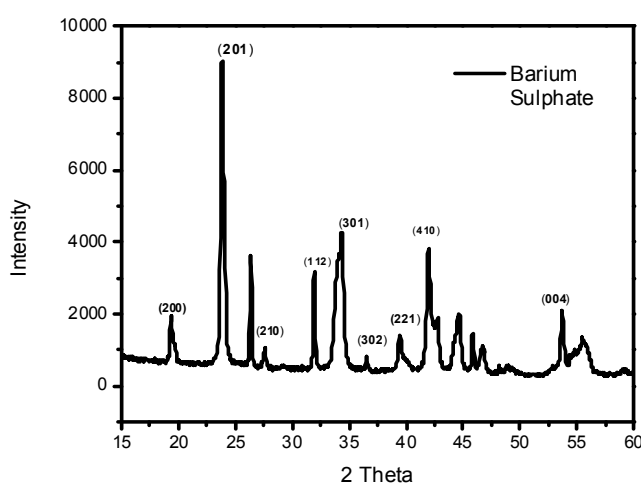

**Figure S1:** The XRD pattern of barium sulphate obtained in the precipitation.

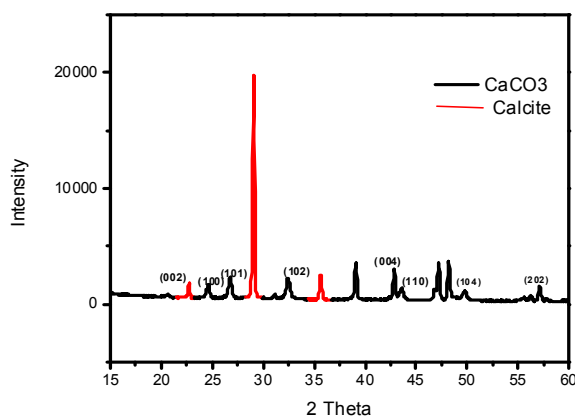

**Figure S2:** The XRD pattern is in consistent with vaterite phase of CaCO<sub>3</sub> (JCPDS NO-24-0030).

There are also few a peaks for the calcite phase.<sup>1</sup>

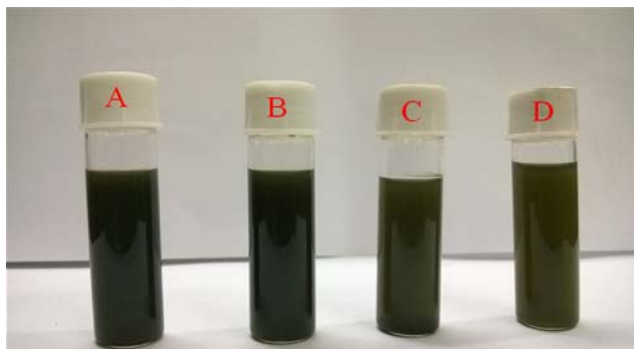

**Figure S3:** Digital images for MoS<sub>2</sub> dispersions in different organic solvent A) Propylene carbonate B) N- methyl pyrrolidone C) N,N-dimehyl formamdie D) Isopropyl alcohol.

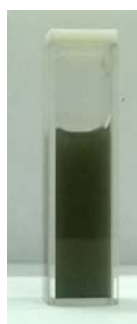

(MoS<sub>2</sub>-GO)

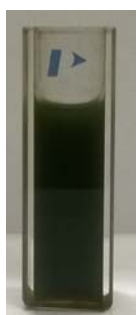

(MoS<sub>2</sub>-RGO)

**Figure S4:** Digital image of MoS<sub>2</sub>-GO and MoS<sub>2</sub>-RGO;

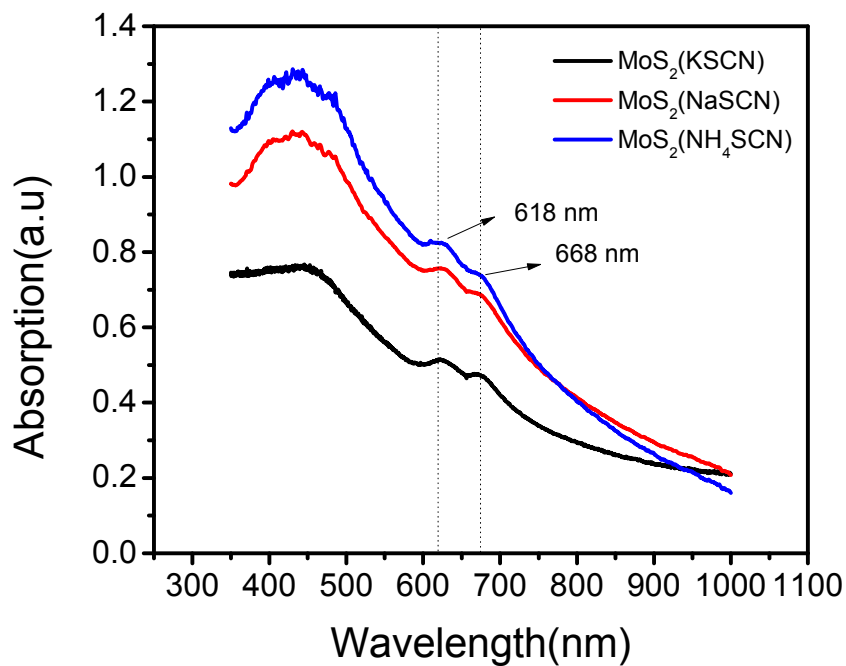

**Figure S5:** UV- vis absorption spectra of as synthesized MoS<sub>2</sub> using different S sources, KSCN, NH<sub>4</sub>SCN and NaSCN.

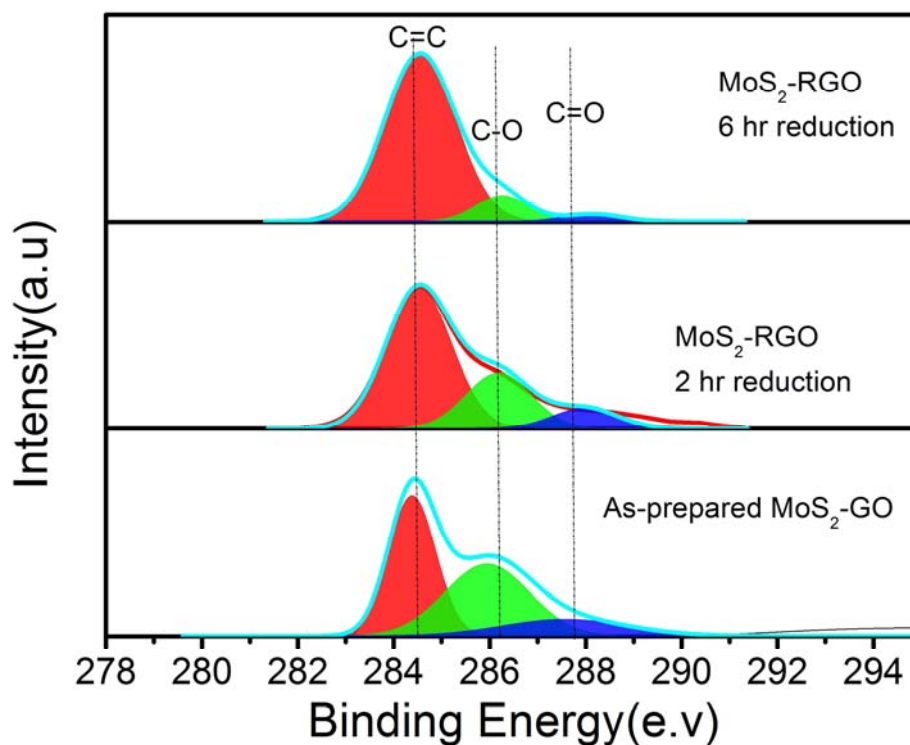

**Figure S6:** High resolution XPS spectra of C1s electrons of (a) As-prepared MoS<sub>2</sub>-GO (a) MoS<sub>2</sub>-RGO after 2 hr reduction c) MoS<sub>2</sub> -RGO after 6 hr reduction, showing substantial loss of oxygenated carbon (green) and gain of graphitic carbon (red) on reduction at longer time.

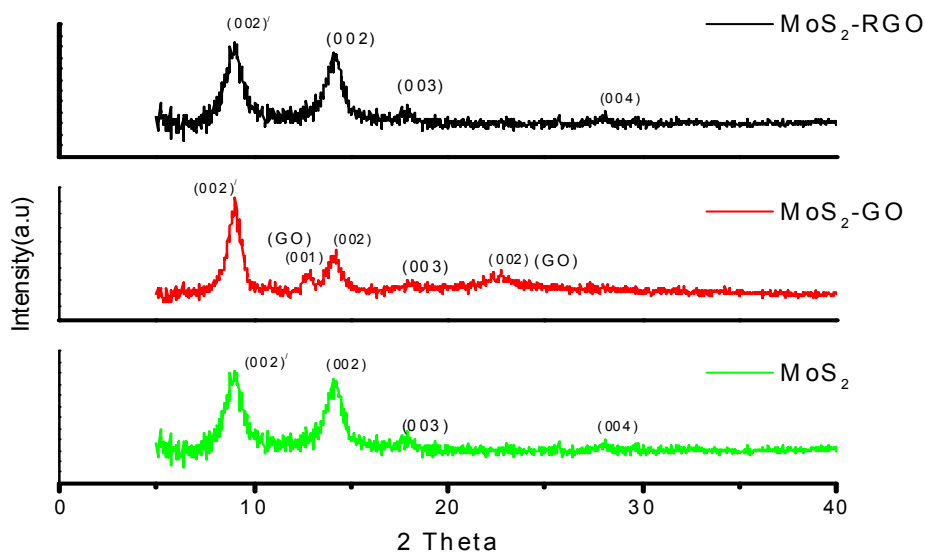

**Figure S7:** XRD pattern of MoS<sub>2</sub>, MoS<sub>2</sub>-GO, and MoS<sub>2</sub>-RGO

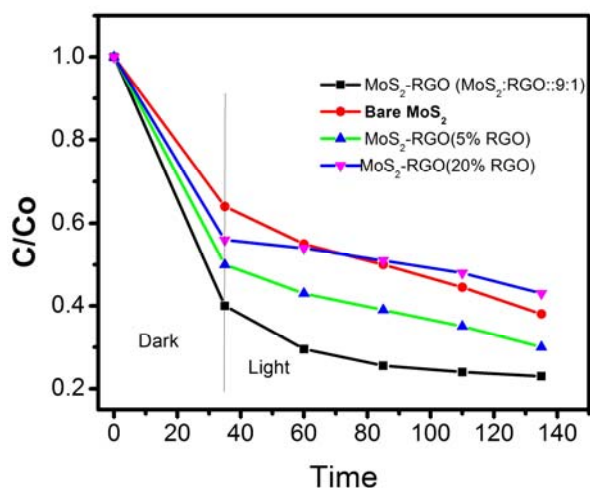

**Figure S8:** C/Co vs time curve, showing degree of visible light induced photocatalysis depending on the content of RGO in MoS<sub>2</sub>-RGO hybrid. MoS<sub>2</sub>-RGO hybrid with 5% RGO has shown higher rate of photocatalysis compared to bare MoS<sub>2</sub> catalyst. A complete decolorisation occurs using MoS<sub>2</sub>-RGO (MoS<sub>2</sub>: RGO:: 9:1). With increasing amount of RGO in MoS<sub>2</sub>-RGO hybrid (20% RGO) the photon absorption decreases and degradation process become slower.

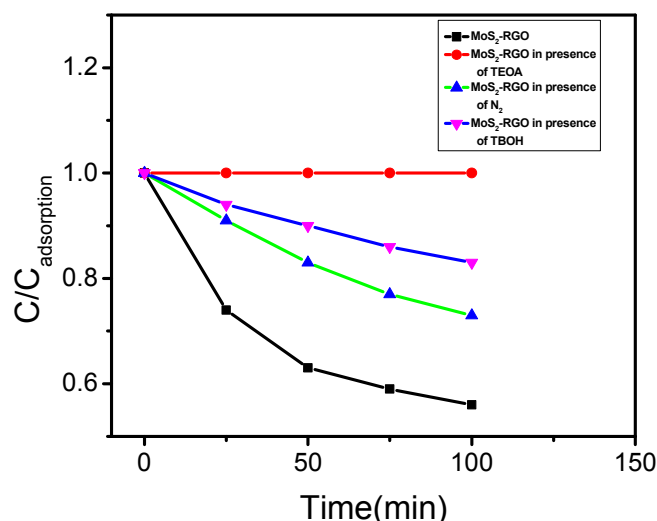

**Figure S9:** Ratio of final concentration and concentration after adsorption equilibrium ( $C/C_{\text{adsorption}}$ ) vs. time showing photocatalytic degradation of Rh-B in presence of various scavengers. In presence of TEOA (hole scavenger) the photo degradation activity diminishes which is much more important than  $N_2$  ( $O_2\cdot$  radical scavenger) and Tertiary Butyl Alcohol ( $OH\cdot$  radical scavenger). Thus the hole oxidation is responsible for mineralisation of the organic dye (Rh-B).

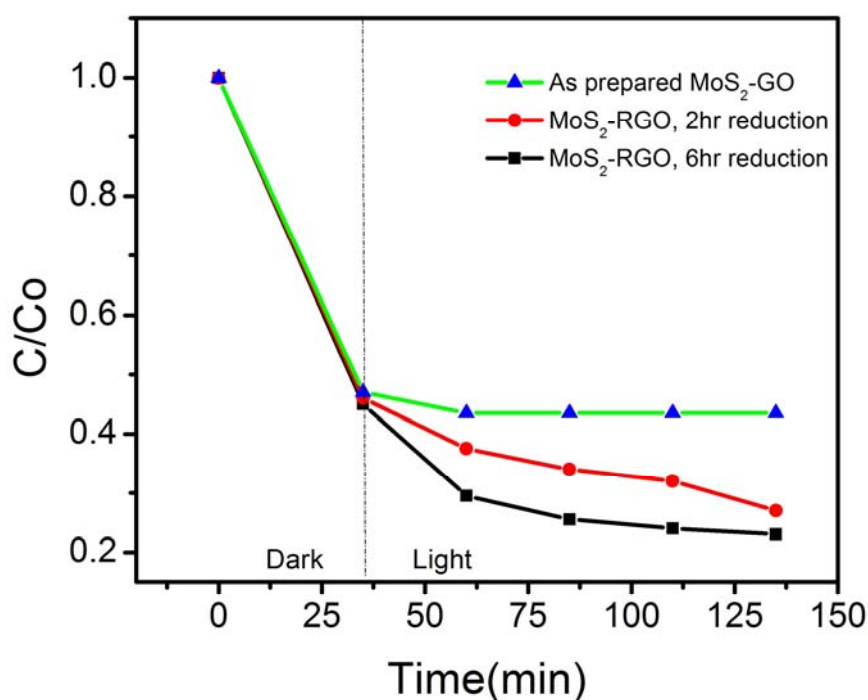

**Figure S10:**  $C/C_0$  Vs time curve, showing degree of visible light induced photocatalysis depending on the extent of GO reduction. The amount of adsorption of dye remains almost same for all the three catalyst system, while, with increase in reduction level of the GO photocatalytic activity of the hybrid increases.

#### References:

<sup>1</sup> Won, Y-H.; Jang, H.S.; Chung, D-W.; Stanciu, L. A. *J. Mater. Chem.*, **2010**, *20*, 7728–773.3
